# Supplementary material for: Ubiquitous Over-Expression of Chromatin Remodeling Factor SRG3 Ameliorates the T Cell-Mediated Exacerbation of EAE by Modulating the Phenotypes of both Dendritic Cells and Macrophages
Source: PLOS journal article supplement (doi:10.1371/journal.pone.0132329), 2015-07-06
Supplement: S8 (10.1371/journal.pone.0132329.s008) [file journal.pone.0132329.s008]

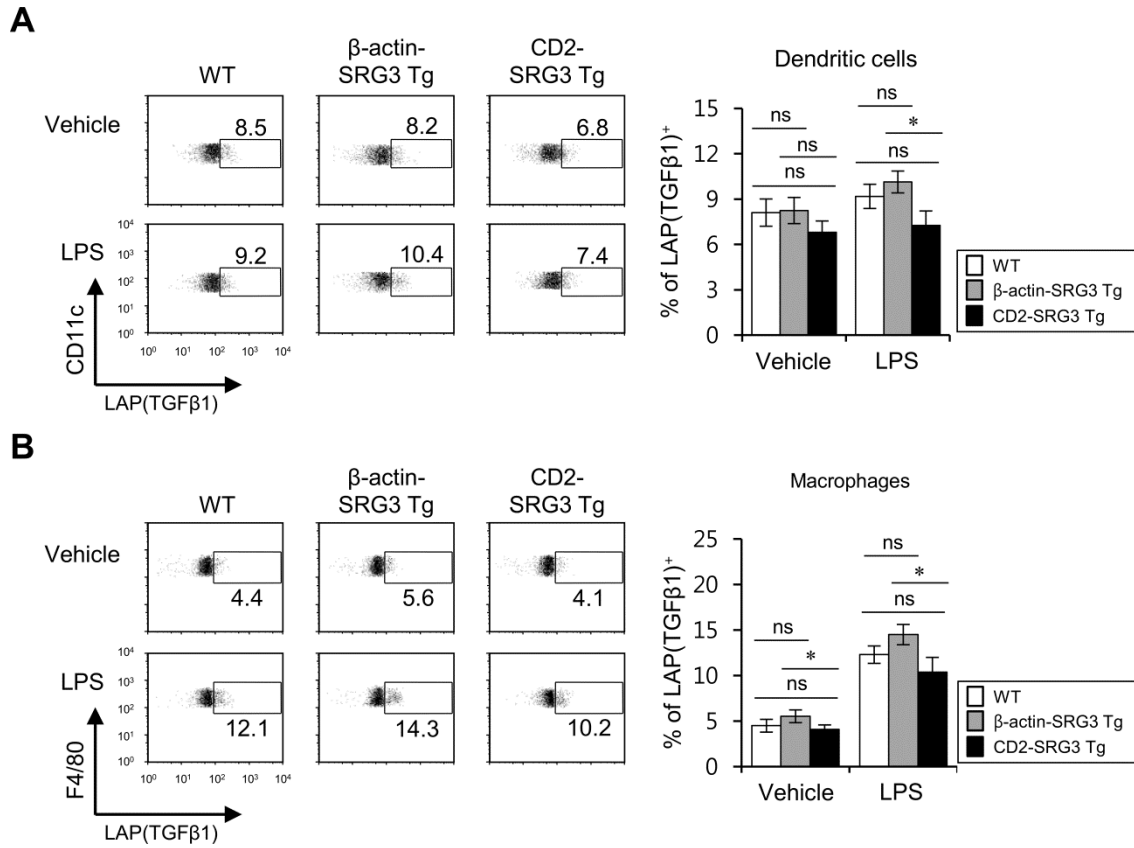

**Figure S8.  $\beta$ -actin-SRG3 Tg and CD2-SRG3 Tg mice showed no significant difference in TGF $\beta$  production of DCs and macrophages in response to LPS stimulation.**

(A-B) WT,  $\beta$ -actin-SRG3 Tg, and CD2-SRG3 Tg mice were i.p. injected with LPS (2  $\mu$ g) or vehicle. Sixteen hrs later, intracellular TGF $\beta$  production was assessed in (A) splenic CD11c<sup>+</sup> DCs and (B) macrophages (CD11c<sup>-</sup> CD11b<sup>+</sup>F4/80<sup>+</sup>) via flow cytometry. The means  $\pm$  SD are shown in the graphs (n=3; \*P<0.05).
